# Supplementary material for: Benzobis(imidazolium) salts as templates for the self-assembly of starburst [24]pseudorotaxanes and their corresponding carbene-based classic [22]pseudorotaxanes
Source: Royal Society of Chemistry journal article supplement (doi:10.1039/c8cc09936g), 2019-01-01
Supplement: c8cc09936g1.pdf [file c8cc09936g1.pdf]

*Electronic Supplementary Information for:*

**Benzobis(imidazolium) salts as templates for the self-assembly of starburst [2<sub>4</sub>]pseudorotaxanes and their corresponding carbene-based classic [2<sub>2</sub>]pseudorotaxanes**

Mathew W. Foster,<sup>a</sup> Benjamin T. Mehl,<sup>a</sup> Edward M. Treadwell,<sup>a</sup> Radu F. Semeniuc,<sup>\*a</sup> and Kraig A. Wheeler<sup>b</sup>

a) *Department of Chemistry and Biochemistry, Eastern Illinois University, Charleston, Illinois, 61920, United States.*

b) *Department of Chemistry, Whitworth University, Spokane, Washington, 99251, United States.*

**Experimental details**

**General considerations**

Operations requiring inert (nitrogen) atmosphere were carried out using standard Schlenk techniques and an MBraun LabStar dry-box. Solvents were dried by conventional methods and distilled under a dry N<sub>2</sub> atmosphere immediately prior to use. NMR spectra were recorded on a 400 MHz Bruker Avance FT-NMR Spectrometer. Electrospray ionization mass spectrometry data were obtained on a MicroMass QTOF spectrometer. Clusters assigned to specific ions show appropriate isotopic patterns as calculated for the atoms present. Bis-1,5-(dinaphtho)-38-crown-10 (15DN38C10)<sup>1</sup> and bis(paraphenylene)-34-crown-10 (BPP34C10)<sup>2</sup> crown ethers were prepared according to published procedures. Benzobis(imidazole) and tetraalkyl/tetraaryl-benzobis-(imidazolium) salts were prepared using modified reported synthetic procedures,<sup>3</sup> as described below. All other reagents were commercially available and used without further purification.

**Synthesis of benzobis(imidazole) (BBI)**

A round bottom flask was charged with a magnetic stir bar, 1,2,4,5-benzenetetraamine tetrahydrochloride (2.84 g, 0.01 mol) and formic acid (88-99%, 75 mL). The flask was fitted with a condenser and mixture was heated at reflux overnight. Then, the condenser was replaced with a distillation head and the volume of the solution was reduced to approximately 10 mL. The remaining liquids were removed under vacuum and the resulting solid was dissolved in water and filtered to remove any solid impurities. The solution was brought to pH = 6.5 – 6.8 with 10% NaOH. The precipitate was collected *via* vacuum filtration on a frit, rinsed with cold water, and dried under vacuum over P<sub>2</sub>O<sub>5</sub> to afford the desired benzobis(imidazole) (BBI, 1.36 g, 85 %) as a light brown solid. <sup>1</sup>H-NMR (400 MHz, DMSO-*d*<sub>6</sub>): δ (ppm) 8.18 (s, 2H, C2-*H*), 7.69 (s, 2H, C<sub>6</sub>*H*<sub>2</sub>).

## General procedure for the synthesis of benzobis(imidazolium) axles

A high-pressure vial was charged with a stirring bar, BBI (0.158 g, 1.0 mmol), Na<sub>2</sub>CO<sub>3</sub> (0.424 g, 4.0 mmol), and anhydrous CH<sub>3</sub>CN (50 mL). After the addition of the appropriate amount of the halo-derivative, the vial was sealed with a Teflon cap and the mixture was stirred in an oil bath at 100°C for 48 h. The mixture was then allowed to cool to room temperature, and the resulting white precipitate was filtered on a frit, washed with cold acetonitrile (15 mL) and diethyl ether (20 mL). The solids were taken in methanol (75 mL) and the solution filtered to remove the inorganic salts. After removal of methanol, the [BBI-H<sub>2</sub>-R<sub>4</sub>]<sup>2+</sup> salts were dissolved in water and treated with an excess of a saturated aqueous solution of NH<sub>4</sub>PF<sub>6</sub>. The resulting precipitates were filtered, washed with water and dried over P<sub>2</sub>O<sub>5</sub> to afford the desired axles as white powders.

**[BBI-H<sub>2</sub>-Me<sub>4</sub>](PF<sub>6</sub>)<sub>2</sub>:** Prepared using MeI (0.250 mL, 4.0 mmol). Yield 0.465 g (91 %). <sup>1</sup>H-NMR (400 MHz, acetone-*d*<sub>6</sub>): δ (ppm) 9.83 (s, 2 H, C2-*H*), 8.88 (s, 2 H, C<sub>6</sub>H<sub>2</sub>), 4.43 (s, 12 H, Imd-CH<sub>3</sub>).

**[BBI-H<sub>2</sub>-Bu<sub>4</sub>](PF<sub>6</sub>)<sub>2</sub>:** Prepared using BuBr (0.431 mL, 4.0 mmol). Yield 0.622 g (92 %). <sup>1</sup>H-NMR (400 MHz, acetone-*d*<sub>6</sub>): δ (ppm) 10.12 (s, 2 H, C2-*H*), 9.13 (s, 2 H, C<sub>6</sub>H<sub>2</sub>), 4.85 (t, J = 7.36 Hz, 8 H, Imd-CH<sub>2</sub>-), 2.17 (p, J = 5.36 Hz, 8 H, -CH<sub>2</sub>-), 1.51 (sextet, J = 7.4 Hz, 8 H, -CH<sub>2</sub>-), 0.99 (t, J = 7.36 Hz, 12 H, -CH<sub>3</sub>).

**[BBI-H<sub>2</sub>-Bn<sub>4</sub>](PF<sub>6</sub>)<sub>2</sub>:** Prepared using BnBr (0.475 mL, 4.0 mmol). Yield 0.695 g (86 %). <sup>1</sup>H-NMR (400 MHz, acetone-*d*<sub>6</sub>): δ (ppm) 10.15 (s, 2 H, C2-*H*), 8.67 (s, 2 H, C<sub>6</sub>H<sub>2</sub>), 7.57-7.54 (m, 8 H, C<sub>6</sub>H<sub>5</sub>), 7.45-7.42 (m, 12 H, C<sub>6</sub>H<sub>5</sub>), 5.99 (s, 8 H, Imd-CH<sub>2</sub>-Ph).

**[BBI-H<sub>2</sub>-[CH<sub>2</sub>Ph(3,5-*t*-Bu)<sub>2</sub>]<sub>4</sub>](PF<sub>6</sub>)<sub>2</sub>:** Prepared using (3,5-*t*-Bu)<sub>2</sub>PhCH<sub>2</sub>Br (1.133 g, 4 mmol). Yield 1.028 g (82 %). <sup>1</sup>H-NMR (400 MHz, acetone-*d*<sub>6</sub>): δ (ppm) 9.74 (s, 2 H, C2-*H*), 9.13 (s, 2 H, C<sub>6</sub>H<sub>2</sub>), 7.58 (t, J = 1.76 Hz, 4 H, C<sub>6</sub>H<sub>5</sub>), 7.48 (d, J = 1.76 Hz, 8 H, C<sub>6</sub>H<sub>5</sub>), 5.95 (s, 8 H, Imd-CH<sub>2</sub>-Ph), 1.28 (s, 72 H, Ph-*t*-C<sub>4</sub>H<sub>9</sub>).

**[BBI-H<sub>2</sub>-[(CH<sub>2</sub>)<sub>3</sub>OH]<sub>4</sub>](PF<sub>6</sub>)<sub>2</sub>:** Prepared using 3-bromo-*n*-propanol (0.363 mL, 4 mmol). Yield 0.532 g (78 %). <sup>1</sup>H-NMR (400 MHz, acetone-*d*<sub>6</sub>): δ (ppm) 9.96 (s, 2 H, C2-*H*), 9.03 (s, 2 H, C<sub>6</sub>H<sub>2</sub>), 4.96 (t, J = 6.8 Hz, 8 H, Imd-CH<sub>2</sub>-Ph), 3.73 (t, J = 5.32, 8 H, -CH<sub>2</sub>OH), 2.35 (p, J = 6.72 Hz, 8 H, -CH<sub>2</sub>-).

**[BBI-H<sub>2</sub>-[(CH<sub>2</sub>)<sub>6</sub>Br]<sub>4</sub>](PF<sub>6</sub>)<sub>2</sub>:** Prepared using 1,6-dibromo-*n*-hexane (6.14 mL, 40 mmol). In this case, to minimize the formation of polymeric species, a 10-fold excess of the 1,6-dibromo-*n*-hexane starting material was used. Yield 0.783 g (71 %). <sup>1</sup>H-NMR (400 MHz, acetone-*d*<sub>6</sub>): δ (ppm) 10.04 (s, 2 H, C2-*H*), 9.07 (s, 2 H, C<sub>6</sub>H<sub>2</sub>), 4.85 (t, J = 7.32 Hz, 8 H, Imd-CH<sub>2</sub>-Ph), 3.49 (t, J = 6.70 Hz, 8 H, -CH<sub>2</sub>-Br), 2.24-2.21 (m, 8 H, -CH<sub>2</sub>-), 1.91-1.86 (m, 8 H, -CH<sub>2</sub>-), 1.55 (br, 16 H, -CH<sub>2</sub>-).

## NMR studies

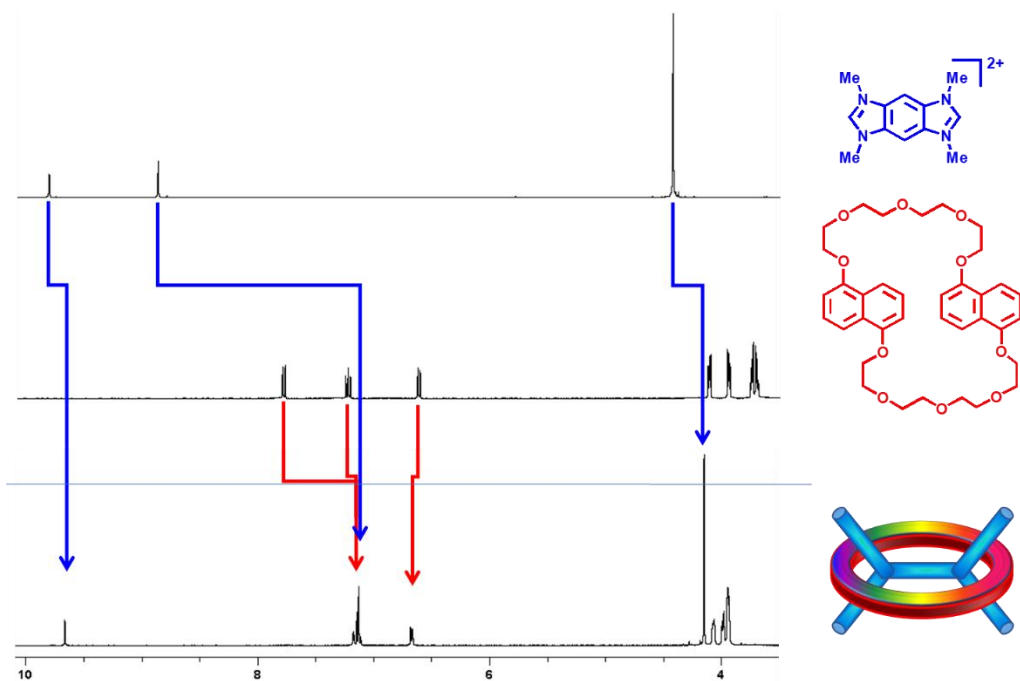

**Fig. S1.** <sup>1</sup>H-NMR spectra (acetone-d<sub>6</sub>) of: [BBI-H<sub>2</sub>-Me<sub>4</sub>]<sup>2+</sup> (top); 15DN38C10 (middle); and an equimolar mixture of the two components (bottom).

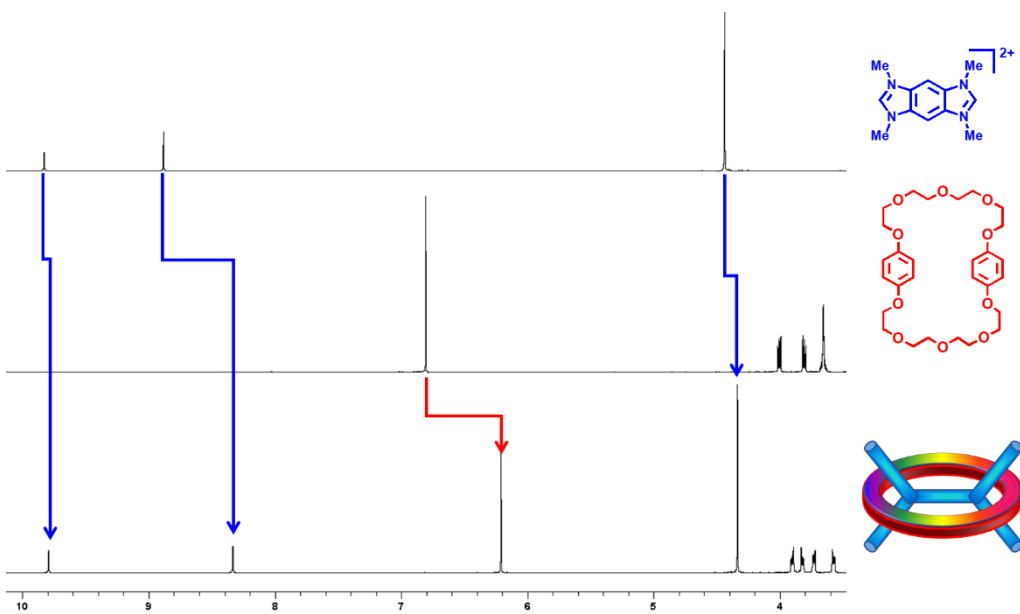

**Fig. S2.** <sup>1</sup>H-NMR spectra (acetone-d<sub>6</sub>) of: [BBI-H<sub>2</sub>-Me<sub>4</sub>]<sup>2+</sup> (top); BPP34C10 (middle); and an equimolar mixture of the two components (bottom).

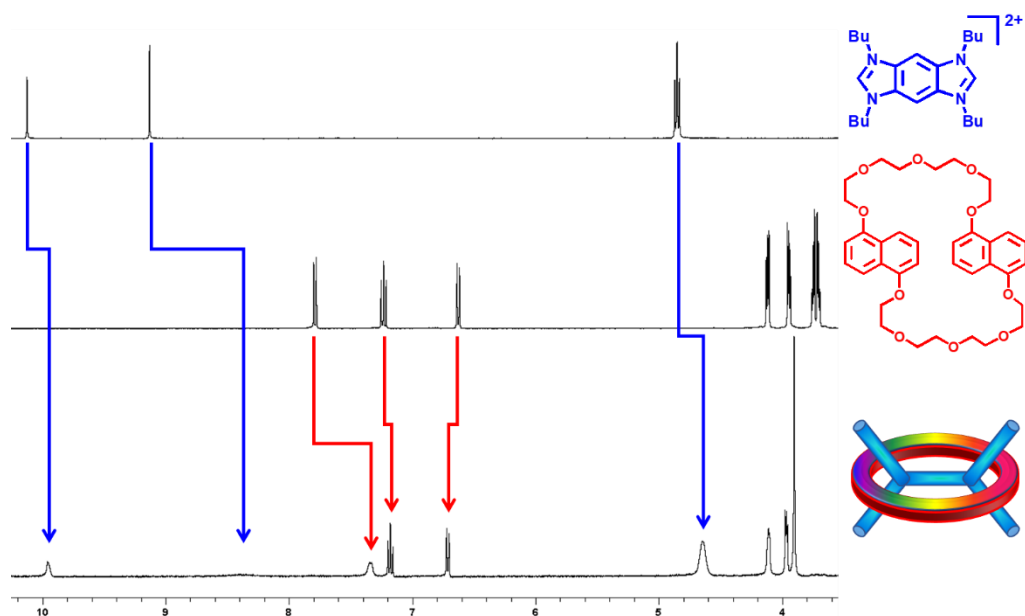

**Fig. S3.** <sup>1</sup>H-NMR spectra (acetone-d<sub>6</sub>) of: [BBI-H<sub>2</sub>-Bu<sub>4</sub>]<sup>2+</sup> (top); 15DN38C10 (middle); and an equimolar mixture of the two components (bottom).

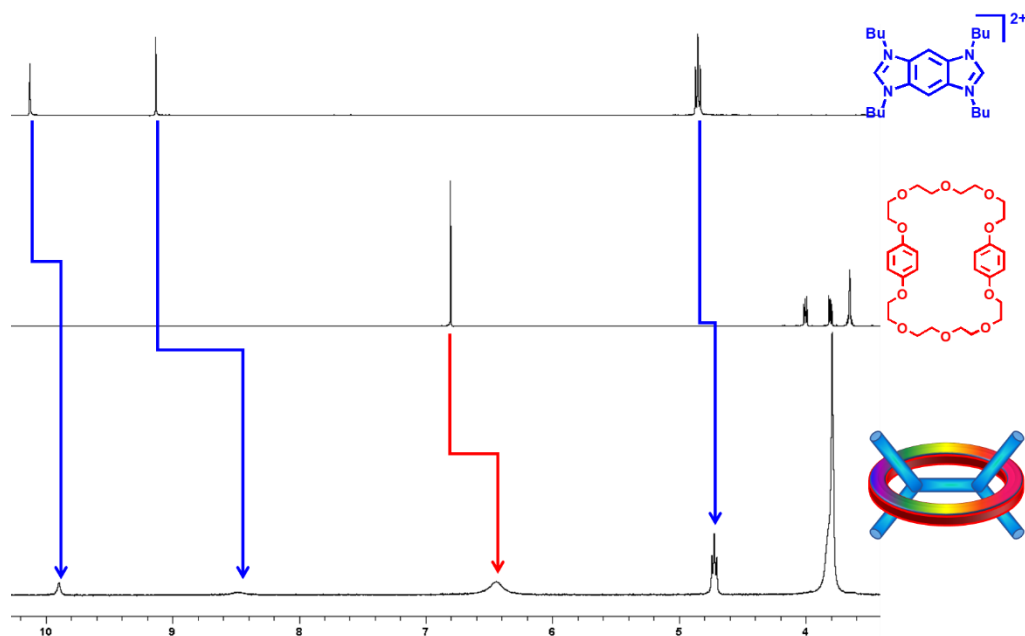

**Fig. S4.** <sup>1</sup>H-NMR spectra (acetone-d<sub>6</sub>) of: [BBI-H<sub>2</sub>-Bu<sub>4</sub>]<sup>2+</sup> (top); BPP34C10 (middle); and an equimolar mixture of the two components (bottom).

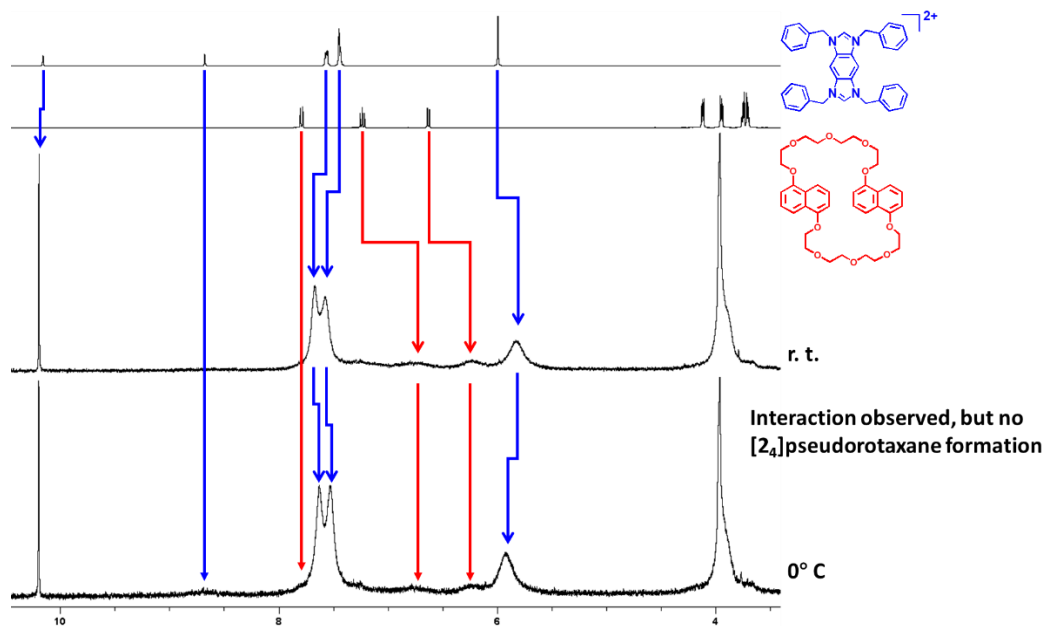

**Fig. S5.** <sup>1</sup>H-NMR spectra (acetone-d<sub>6</sub>) of: [BBI-H<sub>2</sub>-Bn<sub>4</sub>]<sup>2+</sup> (top); 15DN38C10 (middle); and an equimolar mixture of the two components at r. t. and 0° C (bottom). The spectra suggest an interaction of 15DN38C10 with the -CH<sub>2</sub>-Ph side-arms of the axle, but not with the BBI<sup>2+</sup> core.

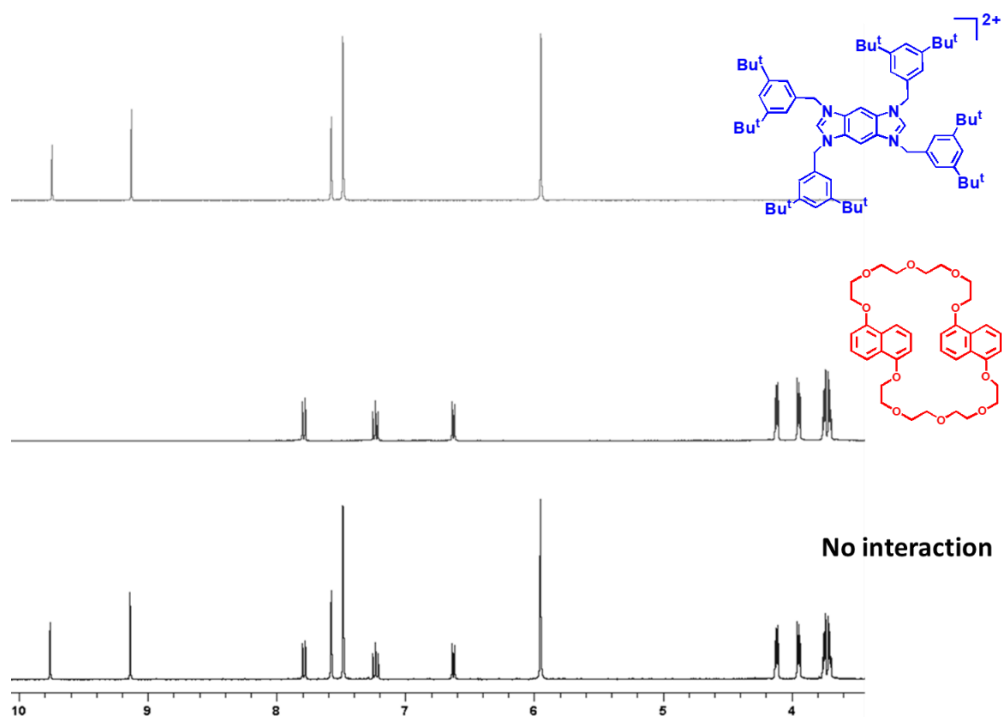

**Fig. S6.** <sup>1</sup>H-NMR spectra (acetone-d<sub>6</sub>) of: [BBI-H<sub>2</sub>-[CH<sub>2</sub>Ph(3,5-*t*-Bu)<sub>2</sub>]<sub>4</sub>]<sup>2+</sup> (top); 15DN38C10 (middle); and an equimolar mixture of the two components (bottom).

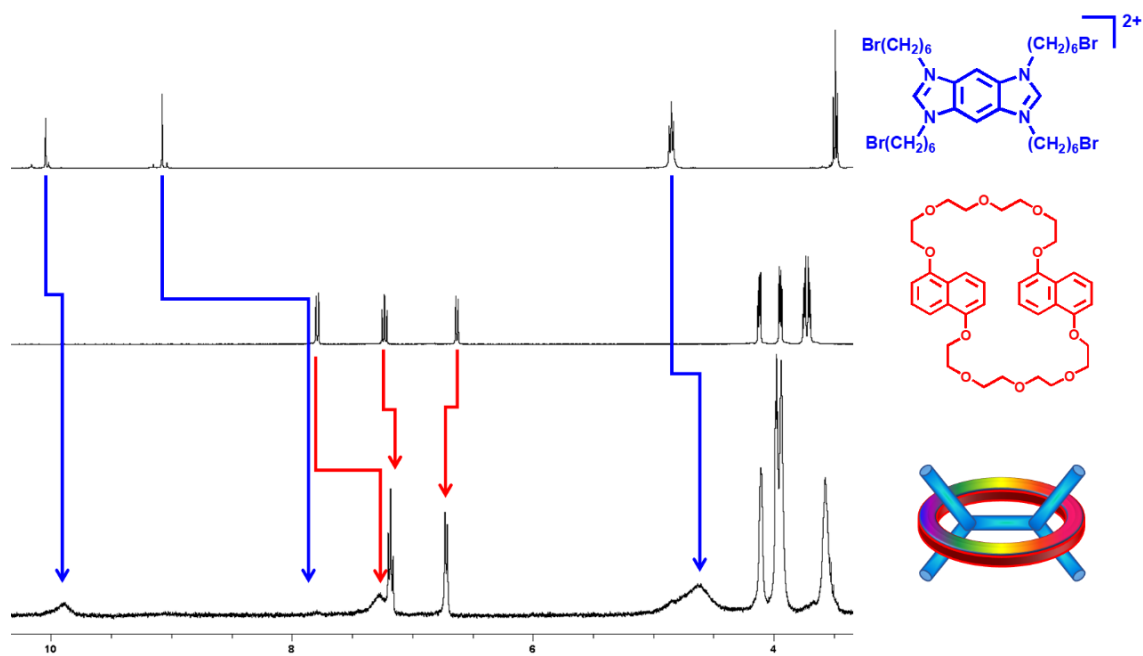

**Fig. S7.** <sup>1</sup>H-NMR spectra (acetone-d<sub>6</sub>) of: [BBI-H<sub>2</sub>-[(CH<sub>2</sub>)<sub>6</sub>Br]<sub>4</sub>]<sup>2+</sup> (top); 15DN38C10 (middle); and an equimolar mixture of the two components (bottom).

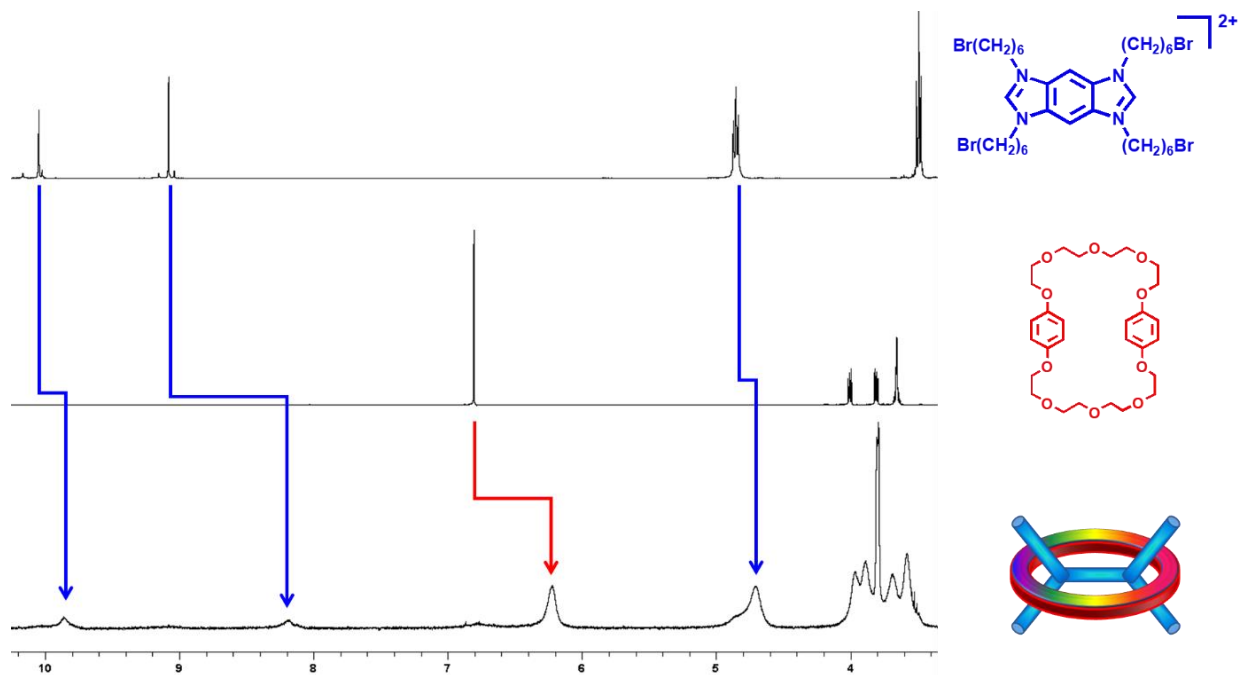

**Fig. S8.** <sup>1</sup>H-NMR spectra (acetone-d<sub>6</sub>) of: [BBI-H<sub>2</sub>-[(CH<sub>2</sub>)<sub>6</sub>Br]<sub>4</sub>]<sup>2+</sup> (top); BPP34C10 (middle); and an equimolar mixture of the two components (bottom).

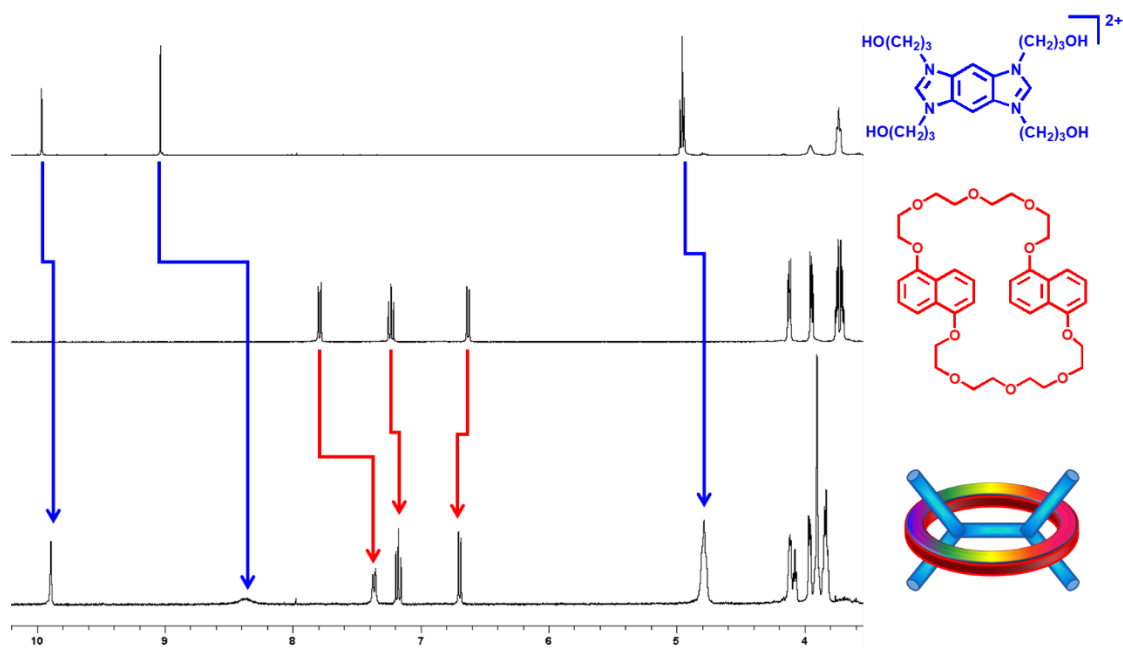

**Fig. S9.**  $^1\text{H-NMR}$  spectra (acetone- $\text{d}_6$ ) of:  $[\text{BBI-H}_2\text{-}[(\text{CH}_2)_3\text{OH}]_4]^{2+}$  (top); 15DN38C10 (middle); and an equimolar mixture of the two components (bottom).

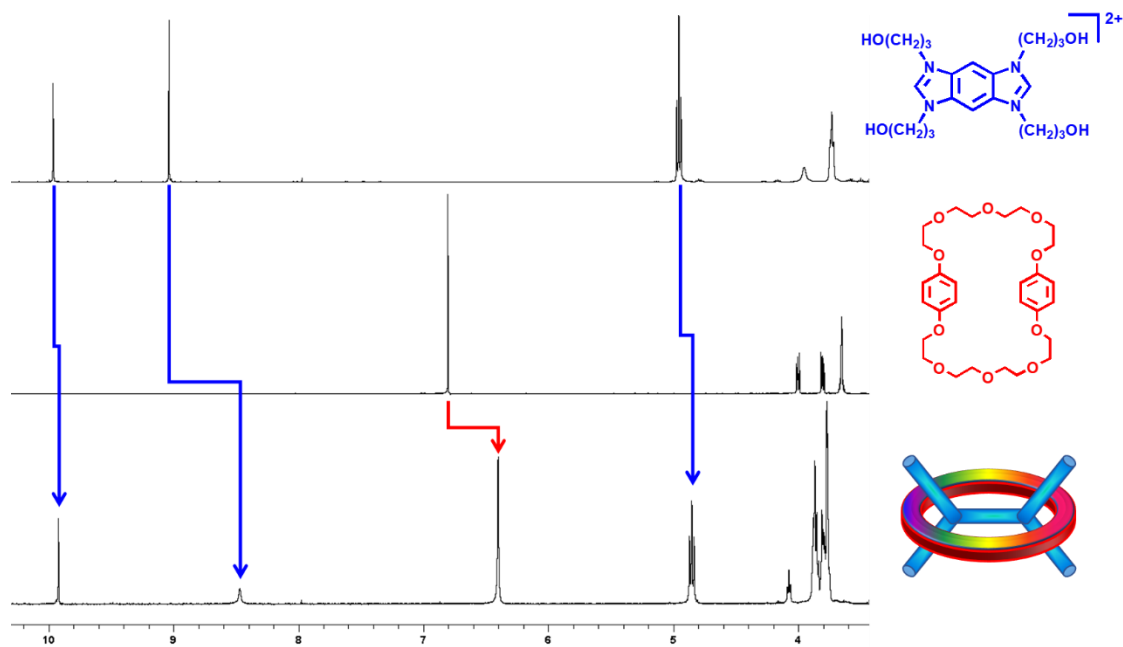

**Fig. S10.**  $^1\text{H-NMR}$  spectra (acetone- $\text{d}_6$ ) of:  $[\text{BBI-H}_2\text{-}[(\text{CH}_2)_3\text{OH}]_4]^{2+}$  (top); BPP34C10 (middle); and an equimolar mixture of the two components (bottom).

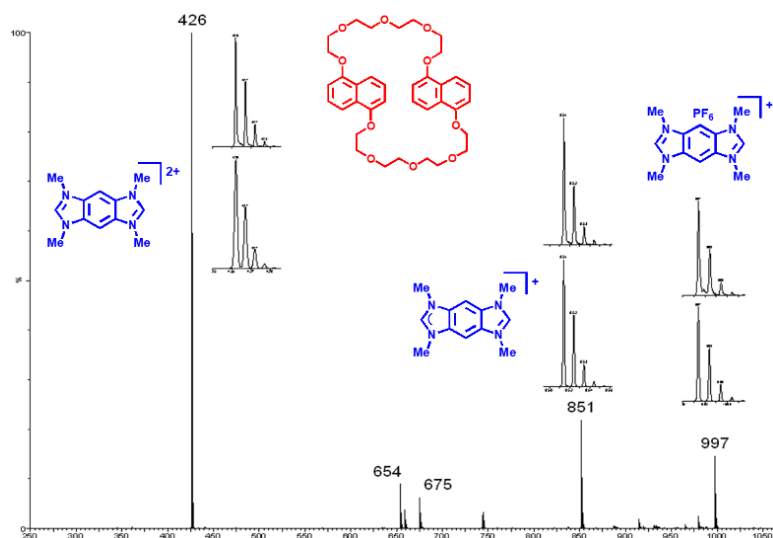

**Fig. S11.** ESI<sup>+</sup>/MS spectrum of a 1:1 mixture of [BBI-H<sub>2</sub>-Me<sub>4</sub>](PF<sub>6</sub>)<sub>2</sub> and 15DN38C10.

**Table S1.** ESI<sup>+</sup>/MS data for equimolar mixtures of [BBI-H<sub>2</sub>-R<sub>4</sub>]<sup>2+</sup> axles and crown ethers (m/z (%)).

| R / Crown      | {Axle⊂C} <sup>2+</sup> | {[Axle⊂C](PF <sub>6</sub> ) <sup>+</sup> | {[Carbene]⊂C} <sup>+</sup> |
|----------------|------------------------|------------------------------------------|----------------------------|
| Me / 15DN38C10 | 426 (100)              | 997 (20)                                 | 851 (25)                   |
| Me / BPP34C10  | 376 (100)              | 897 (70)                                 | 751 (35)                   |
| Bu / 15DN38C10 | 510 (100)              | 1166 (20)                                | 1020 (17)                  |
| Bu / BPP34C10  | 460 (70)               | 1066 (35)                                | 920 (5)                    |
| Br / 15DN38C10 | 724 (70)               | 1593 (4)                                 | -                          |
| Br / BPP34C10  | 674 (60)               | 1493 (5)                                 | -                          |
| OH / 15DN38C10 | 514 (100)              | 1174 (17)                                | 1028 (15)                  |
| OH / BPP34C10  | 464 (30)               | 1074 (3)                                 | 928 (5)                    |

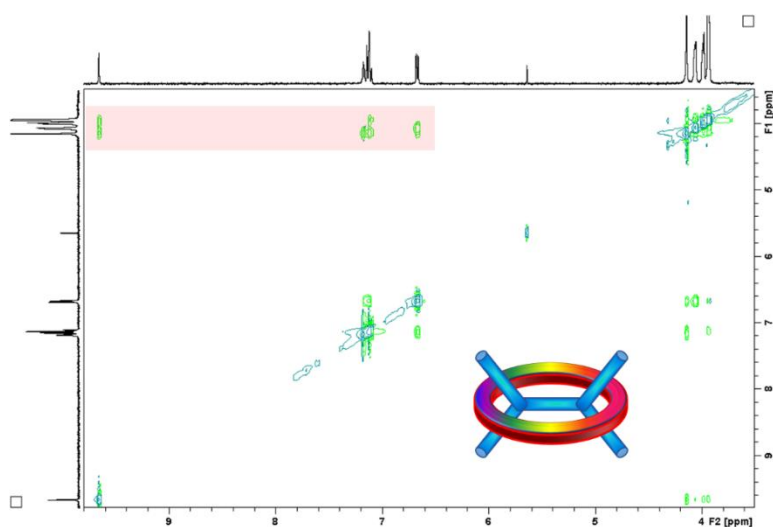

**Fig. S12.** <sup>1</sup>H-<sup>1</sup>H NOESY spectrum (acetone-*d*<sub>6</sub>) of the {[BBI-H<sub>2</sub>-Me<sub>4</sub>]⊂15DN38C10}<sup>2+</sup> pseudorotaxane, displaying NOE correlations between the axle and the 15DN38C10 macrocycle.



### NMR titrations

$^1\text{H}$ -NMR titrations were conducted in acetone- $d_6$  at 293 K. To 500  $\mu\text{L}$  of a solution of the BBI axle were added aliquots of the crown ethers (addition of 100  $\mu\text{L}$  represented the addition of 0.2 equivalents). Thirteen titration points (for 0, 0.2, 0.4, 0.6, 0.8, 1.0, 1.2, 1.4, 1.6, 1.8, 2.0, 2.5, and 3.0 equivalents of crown) were obtained in each case. The chemical shift of the protons situated on the imidazolium C2 atom and on the  $\alpha$ - $\text{CH}_2$ -R (R = H for the Me derivative) bonded to the N atom of the imidazolium ring was monitored. The results were averaged and used for the determination of the  $K_a$  and  $\Delta G^0$  thermodynamic parameters.

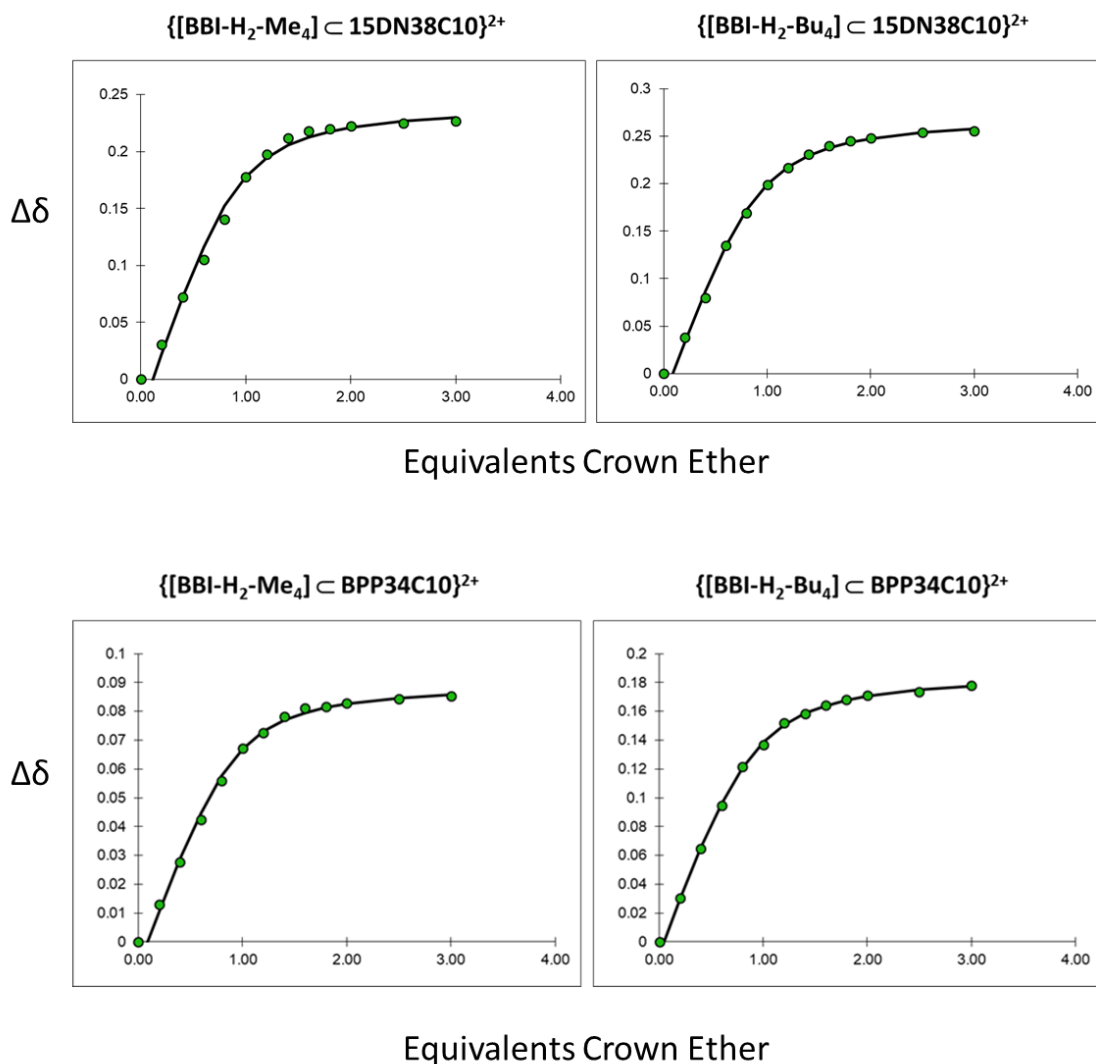

**Fig. S13.**  $^1\text{H}$ -NMR titration curves  $[\text{BBI-H}_2\text{-Me}_4] \subset 15\text{DN38C10}\}^{2+}$  (top left),  $\{[\text{BBI-H}_2\text{-Bu}_4] \subset 15\text{DN38C10}\}^{2+}$  (top right),  $\{[\text{BBI-H}_2\text{-Me}_4] \subset \text{BPP34C10}\}^{2+}$  (bottom left), and  $\{[\text{BBI-H}_2\text{-Bu}_4] \subset \text{BPP34C10}\}^{2+}$  (bottom right).

Job plots were obtained from the titration data. The mole fractions of BBI axles ( $\chi_{\text{BBI}}$ ) were calculated for each data point by dividing the number of moles of the BBI axle by the total number of moles present in solution. The differences in the chemical shift of a given proton,  $\Delta\delta$ , were calculated for each point by subtracting the observed chemical shift from the chemical shift of that particular proton in the absence of the crown. The Job plots were then produced by plotting  $\Delta\delta \cdot \chi_{\text{BBI}}$  against  $\chi_{\text{BBI}}$ .

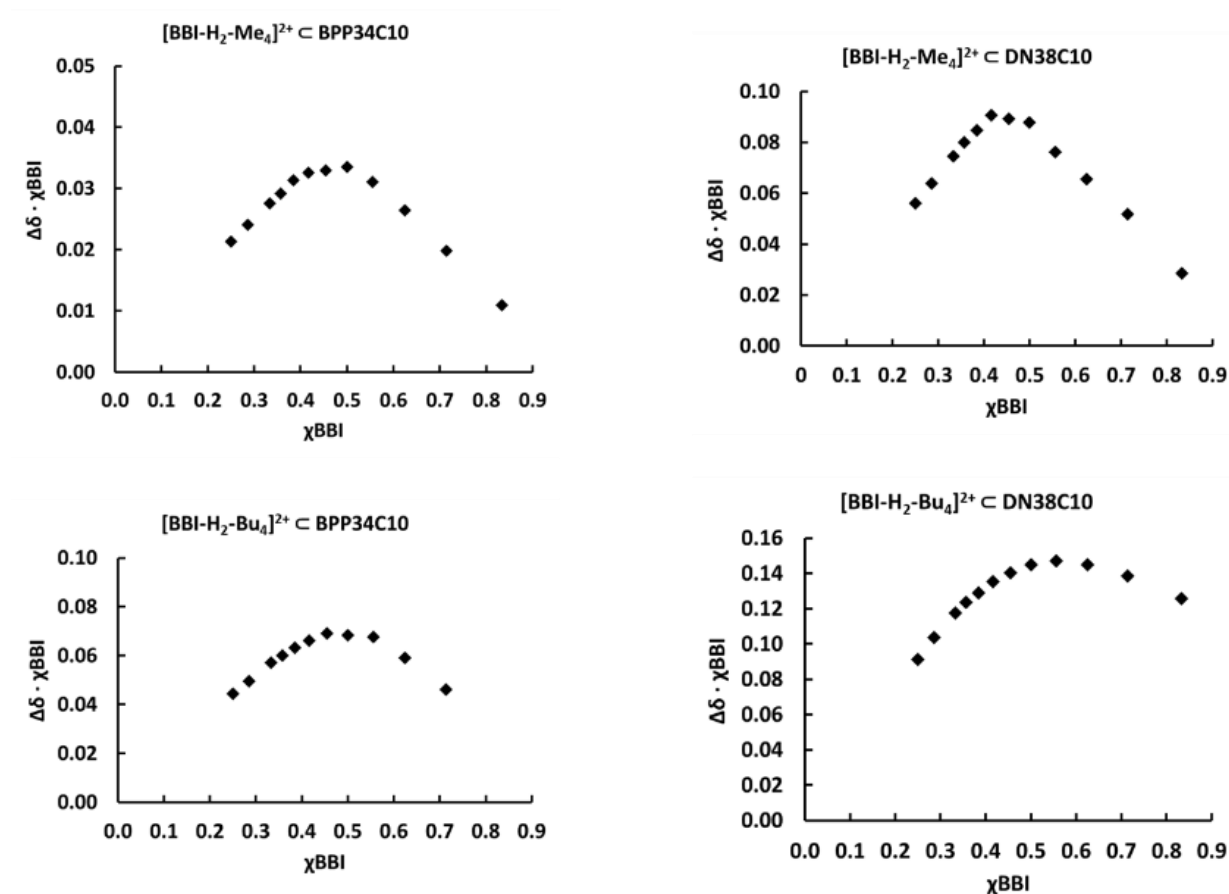

**Fig. S14.** Job plots for  $\{[\text{BBI-H}_2\text{-Me}_4]\text{C}[\text{BPP34C10}]\}^{2+}$  (top left),  $\{[\text{BBI-H}_2\text{-Me}_4]\text{C}[\text{DN38C10}]\}^{2+}$  (top right),  $\{[\text{BBI-H}_2\text{-Bu}_4]\text{C}[\text{BPP34C10}]\}^{2+}$  (bottom left), and  $\{[\text{BBI-H}_2\text{-Bu}_4]\text{C}[\text{DN38C10}]\}^{2+}$  (bottom right).

### Crystallographic studies

The  $[2_4]$ pseudorotaxanes were prepared by mixing equimolar solutions of the axle and crown ethers in acetone. Vapor diffusion of diethyl ether into an acetone solution of the components yielded single crystals which were subjected to X-ray diffraction studies. The X-ray data were collected at 100 K on a Bruker SMART APEXII CCD diffractometer equipped with Cu K $\alpha$  radiation. Intensities were collected using phi and omega scans and were corrected for Lorentz polarization and absorption effects. The *X-SEED* software

platform,<sup>4</sup> equipped with *SHELXS* and *SHELXL* modules on a PC computer,<sup>5</sup> was used for all structure solution and refinement calculations and molecular graphics. The structure was solved by direct methods and refined by anisotropic full-matrix least-squares for all non-hydrogen atoms. All hydrogen atoms were placed in calculated positions and refined using a riding model with fixed thermal parameters. Crystallographic details for these compounds are summarized in Table S2.

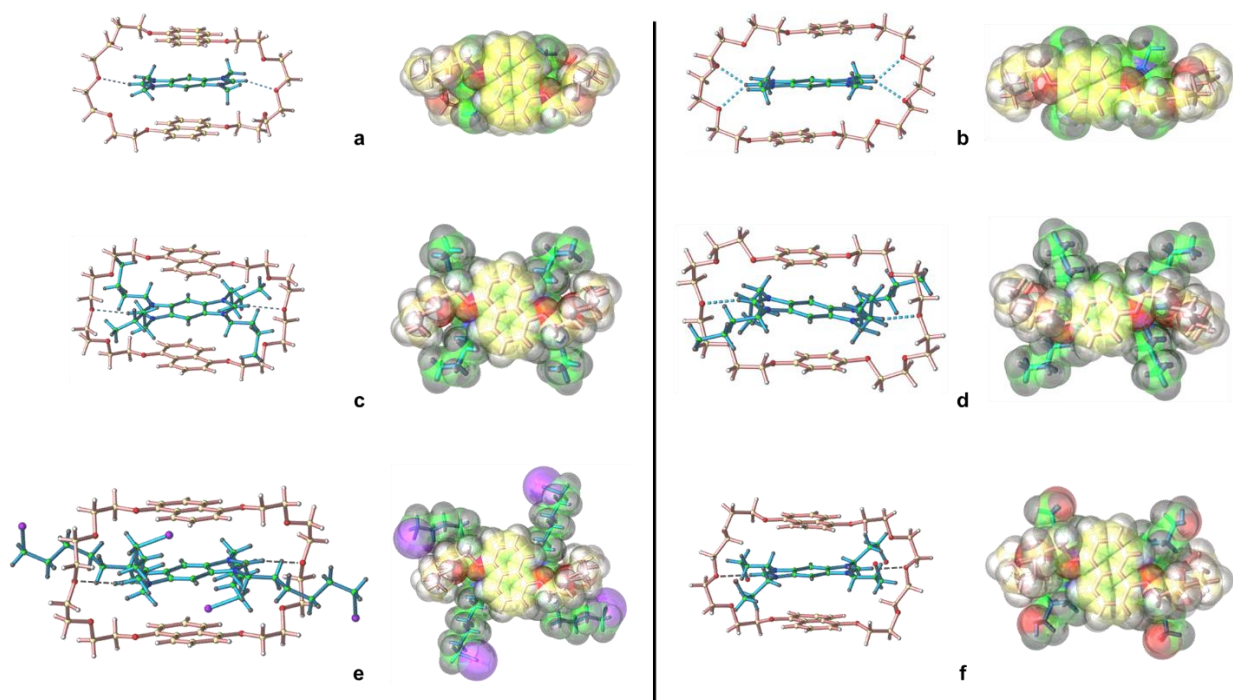

**Fig S15.** X-ray structures (ball and stick and space filling representations) of: a)  $\{[\text{BBI-H}_2\text{-Me}_4]\text{C}15\text{DN}38\text{C}10\}^{2+}$ ; b)  $\{[\text{BBI-H}_2\text{-Me}_4]\text{C}15\text{PP}34\text{C}10\}^{2+}$ ; c)  $\{[\text{BBI-H}_2\text{-Bu}_4]\text{C}15\text{DN}38\text{C}10\}^{2+}$ ; d)  $\{[\text{BBI-H}_2\text{-Bu}_4]\text{C}15\text{PP}34\text{C}10\}^{2+}$ ; e)  $\{[\text{BBI-H}_2\text{-}((\text{CH}_2)_6\text{Br})_4]\text{C}15\text{DN}38\text{C}10\}^{2+}$ ; f)  $\{[\text{BBI-H}_2\text{-}((\text{CH}_2)_3(\text{OH})_4)\text{C}15\text{DN}38\text{C}10\}^{2+}$  dications; color code: axle – carbon = green, hydrogen = black; wheel – carbon = yellow, hydrogen = white. The dashed lines depict de hydrogen bonding interactions between the C2-H atom on the  $\text{BBI}^{2+}$  axle and O atoms on the crown ether molecules.

**Table S2.** Crystal and refinement data for the compounds described in this work

|                                                                                                                | {[BBI-H <sub>2</sub> -Me <sub>4</sub> ] ⊂ 15DN38C10}(PF <sub>6</sub> ) <sub>2</sub>           | {[BBI-H <sub>2</sub> -Me <sub>4</sub> ] ⊂ BPP34C10}(PF <sub>6</sub> ) <sub>2</sub>            | {[BBI-H <sub>2</sub> -Bu <sub>4</sub> ] ⊂ 15DN38C10}(PF <sub>6</sub> ) <sub>2</sub>           | {[BBI-H <sub>2</sub> -Bu <sub>4</sub> ] ⊂ BPP34C10}(PF <sub>6</sub> ) <sub>2</sub>            |
|----------------------------------------------------------------------------------------------------------------|-----------------------------------------------------------------------------------------------|-----------------------------------------------------------------------------------------------|-----------------------------------------------------------------------------------------------|-----------------------------------------------------------------------------------------------|
| Crystal data                                                                                                   |                                                                                               |                                                                                               |                                                                                               |                                                                                               |
| Chemical formula                                                                                               | C <sub>48</sub> H <sub>60</sub> F <sub>12</sub> N <sub>4</sub> O <sub>10</sub> P <sub>2</sub> | C <sub>40</sub> H <sub>56</sub> F <sub>12</sub> N <sub>4</sub> O <sub>10</sub> P <sub>2</sub> | C <sub>60</sub> H <sub>83</sub> F <sub>12</sub> N <sub>4</sub> O <sub>10</sub> P <sub>2</sub> | C <sub>55</sub> H <sub>86</sub> F <sub>12</sub> N <sub>4</sub> O <sub>11</sub> P <sub>2</sub> |
| <i>M<sub>r</sub></i>                                                                                           | 1142.94                                                                                       | 1042.83                                                                                       | 1310.24                                                                                       | 1269.22                                                                                       |
| Crystal system, space group                                                                                    | Tetragonal, <i>I</i> 2 <i>d</i>                                                               | Triclinic, <i>P</i>                                                                           | Triclinic, <i>P</i>                                                                           | Triclinic, <i>P</i>                                                                           |
| Temperature (K)                                                                                                | 100                                                                                           | 100                                                                                           | 100                                                                                           | 100                                                                                           |
| <i>a</i> , <i>b</i> , <i>c</i> (Å)                                                                             | 22.7748 (2), 22.7748 (2), 22.9902 (3)                                                         | 8.4853 (13), 11.6056 (17), 12.1927 (18)                                                       | 10.8478 (2), 12.9719 (2), 12.9821 (2)                                                         | 11.0528 (4), 16.2715 (6), 17.9174 (6)                                                         |
| <i>α</i> , <i>β</i> , <i>γ</i> (°)                                                                             | 90, 90, 90                                                                                    | 84.209 (7), 73.935 (6), 83.516 (7)                                                            | 75.025 (1), 67.442 (1), 69.602 (1)                                                            | 92.546 (2), 97.823 (2), 107.791 (2)                                                           |
| <i>V</i> (Å <sup>3</sup> )                                                                                     | 11924.8 (3)                                                                                   | 1143.4 (3)                                                                                    | 1564.75 (5)                                                                                   | 3027.05 (19)                                                                                  |
| <i>Z</i>                                                                                                       | 8                                                                                             | 1                                                                                             | 1                                                                                             | 2                                                                                             |
| <i>μ</i> (mm <sup>-1</sup> )                                                                                   | 1.46                                                                                          | 1.85                                                                                          | 1.47                                                                                          | 1.51                                                                                          |
| Crystal size (mm)                                                                                              | 0.43 × 0.27 × 0.21                                                                            | 0.36 × 0.27 × 0.03                                                                            | 0.50 × 0.35 × 0.15                                                                            | 0.34 × 0.23 × 0.11                                                                            |
| Data collection                                                                                                |                                                                                               |                                                                                               |                                                                                               |                                                                                               |
| Diffractometer                                                                                                 | Bruker APEXII CCD                                                                             | Bruker APEXII CCD                                                                             | Bruker APEXII CCD                                                                             | Bruker APEXII CCD                                                                             |
| Absorption correction                                                                                          | Multi-scan SADABS (Bruker, 2009)                                                              | Multi-scan SADABS (Bruker, 2010)                                                              | Multi-scan SADABS (Bruker, 2010)                                                              | Multi-scan SADABS (Bruker, 2010)                                                              |
| <i>T<sub>min</sub></i> , <i>T<sub>max</sub></i>                                                                | 0.537, 0.737                                                                                  | 0.554, 0.943                                                                                  | 0.527, 0.815                                                                                  | 0.543, 0.881                                                                                  |
| No. of measured, independent and observed reflections                                                          | 64801, 5414, 4530<br>{ <i>I</i> > 2σ( <i>I</i> )}                                             | 11844, 3476, 2007<br>{ <i>I</i> > 2σ( <i>I</i> )}                                             | 31447, 5501, 4033<br>{ <i>I</i> > 2σ( <i>I</i> )}                                             | 62977, 10685, 7142<br>{ <i>I</i> > 2σ( <i>I</i> )}                                            |
| <i>R<sub>int</sub></i>                                                                                         | 0.109                                                                                         | 0.098                                                                                         | 0.095                                                                                         | 0.107                                                                                         |
| (sin θ/λ) <sub>max</sub> (Å <sup>-1</sup> )                                                                    | 0.601                                                                                         | 0.594                                                                                         | 0.600                                                                                         | 0.601                                                                                         |
| Refinement                                                                                                     |                                                                                               |                                                                                               |                                                                                               |                                                                                               |
| <i>R</i> [ <i>F</i> <sup>2</sup> > 2σ( <i>F</i> <sup>2</sup> )], <i>wR</i> ( <i>F</i> <sup>2</sup> ), <i>S</i> | 0.062, 0.187, 1.06                                                                            | 0.064, 0.166, 1.03                                                                            | 0.054, 0.170, 1.07                                                                            | 0.049, 0.119, 1.02                                                                            |
| No. of reflections                                                                                             | 5414                                                                                          | 3476                                                                                          | 5501                                                                                          | 10685                                                                                         |
| No. of parameters                                                                                              | 348                                                                                           | 310                                                                                           | 410                                                                                           | 763                                                                                           |
| No. of restraints                                                                                              | 27                                                                                            | 0                                                                                             | 0                                                                                             | 0                                                                                             |
| Δρ <sub>max</sub> , Δρ <sub>min</sub> (e Å <sup>-3</sup> )                                                     | 0.86, -0.34                                                                                   | 0.47, -0.28                                                                                   | 0.43, -0.37                                                                                   | 0.72, -0.44                                                                                   |

**Table S2 (continued).** Crystal and refinement data for the compounds described in this work

|                                                                                                                   | {[BBI-H <sub>2</sub> -[(CH <sub>2</sub> ) <sub>3</sub> OH] <sub>4</sub> ] c<br>15DN38C10}(PF <sub>6</sub> ) <sub>2</sub> | {[BBI-H <sub>2</sub> -[(CH <sub>2</sub> ) <sub>6</sub> Br] <sub>4</sub> ] c<br>15DN38C10}(PF <sub>6</sub> ) <sub>2</sub> | {[BBI-Me <sub>4</sub> -(AuPPh <sub>3</sub> ) <sub>2</sub> ] c<br>15DN38C10}(PF <sub>6</sub> ) <sub>2</sub>    |
|-------------------------------------------------------------------------------------------------------------------|--------------------------------------------------------------------------------------------------------------------------|--------------------------------------------------------------------------------------------------------------------------|---------------------------------------------------------------------------------------------------------------|
| Crystal data                                                                                                      |                                                                                                                          |                                                                                                                          |                                                                                                               |
| Chemical formula                                                                                                  | C <sub>56</sub> H <sub>72</sub> F <sub>12</sub> N <sub>4</sub> O <sub>14</sub> P <sub>2</sub>                            | C <sub>68</sub> H <sub>96</sub> Br <sub>4</sub> F <sub>12</sub> N <sub>4</sub> O <sub>10</sub> P <sub>2</sub>            | C <sub>88</sub> H <sub>98</sub> Au <sub>2</sub> F <sub>12</sub> N <sub>4</sub> O <sub>11</sub> P <sub>4</sub> |
| <i>M<sub>r</sub></i>                                                                                              | 1315.11                                                                                                                  | 1739.07                                                                                                                  | 2133.51                                                                                                       |
| Crystal system,<br>space group                                                                                    | Monoclinic, <i>P</i> <sub>2</sub> <sub>1</sub> / <i>n</i>                                                                | Triclinic, <i>P</i>                                                                                                      | Triclinic, <i>P</i>                                                                                           |
| Temperature (K)                                                                                                   | 100                                                                                                                      | 100                                                                                                                      | 100                                                                                                           |
| <i>a</i> , <i>b</i> , <i>c</i> (Å)                                                                                | 11.2760 (4), 12.8324 (4),<br>21.9878 (7)                                                                                 | 10.9879 (4), 13.5898 (4),<br>13.7145 (4)                                                                                 | 8.8880 (3), 12.0830 (5),<br>21.1375 (7)                                                                       |
| α, β, γ (°)                                                                                                       | 90, 90.158 (2), 90                                                                                                       | 78.086 (2), 79.356 (2),<br>67.925 (2)                                                                                    | 77.868 (2), 84.721 (2),<br>75.319 (2)                                                                         |
| <i>V</i> (Å <sup>3</sup> )                                                                                        | 3181.58 (18)                                                                                                             | 1843.89 (10)                                                                                                             | 2145.08 (14)                                                                                                  |
| <i>Z</i>                                                                                                          | 2                                                                                                                        | 1                                                                                                                        | 1                                                                                                             |
| μ (mm <sup>-1</sup> )                                                                                             | 1.49                                                                                                                     | 3.84                                                                                                                     | 7.8                                                                                                           |
| Crystal size (mm)                                                                                                 | 0.43 × 0.42 × 0.30                                                                                                       | 0.52 × 0.48 × 0.28                                                                                                       | 0.44 × 0.32 × 0.13                                                                                            |
| Data collection                                                                                                   |                                                                                                                          |                                                                                                                          |                                                                                                               |
| Diffractometer                                                                                                    | Bruker APEXII CCD                                                                                                        | Bruker APEXII CCD                                                                                                        | Bruker <i>SMART APEX II</i> CCD                                                                               |
| Absorption<br>correction                                                                                          | Multi-scan<br><i>SADABS</i> (Bruker, 2009)                                                                               | Multi-scan<br><i>SADABS</i> (Bruker, 2010)                                                                               | Numerical<br><i>SADABS v2.05</i> (Bruker, 2010)                                                               |
| <i>T<sub>min</sub></i> , <i>T<sub>max</sub></i>                                                                   | 0.534, 0.753                                                                                                             | 0.239, 0.417                                                                                                             | 0.130, 0.430                                                                                                  |
| No. of measured,<br>independent and<br>observed reflections                                                       | 42964, 5712, 4382<br>{ <i>I</i> > 2σ( <i>I</i> )}                                                                        | 37174, 6432, 5812<br>{ <i>I</i> > 2σ( <i>I</i> )}                                                                        | 42232, 7522, 6986<br>{ <i>I</i> > 2σ( <i>I</i> )}                                                             |
| <i>R<sub>int</sub></i>                                                                                            | 0.038                                                                                                                    | 0.041                                                                                                                    | 0.062                                                                                                         |
| (sin θ/λ) <sub>max</sub> (Å <sup>-1</sup> )                                                                       | 0.600                                                                                                                    | 0.6                                                                                                                      | 0.6                                                                                                           |
| Refinement                                                                                                        |                                                                                                                          |                                                                                                                          |                                                                                                               |
| <i>R</i> [ <i>F</i> <sup>2</sup> > 2σ( <i>F</i> <sup>2</sup> )],<br><i>wR</i> ( <i>F</i> <sup>2</sup> ), <i>S</i> | 0.191, 0.548, 2.55                                                                                                       | 0.047, 0.121, 1.04                                                                                                       | 0.048, 0.124, 1.12                                                                                            |
| No. of reflections                                                                                                | 5712                                                                                                                     | 6432                                                                                                                     | 7522                                                                                                          |
| No. of parameters                                                                                                 | 614                                                                                                                      | 456                                                                                                                      | 628                                                                                                           |
| No. of restraints                                                                                                 | 620                                                                                                                      | 0                                                                                                                        | 99                                                                                                            |
| Δρ <sub>max</sub> , Δρ <sub>min</sub> (e Å <sup>-3</sup> )                                                        | 2.04, -0.68                                                                                                              | 1.72, -1.16                                                                                                              | 3.90, -0.98                                                                                                   |

**Table S3.** Essential non-covalent interactions holding together the pseudorotaxane assemblies.<sup>a</sup>

|                                                                                                                       | C2-H...O <sub>crow</sub><br>(Å) | C2...O <sub>crow</sub><br>(Å) | C2-H-O <sub>crow</sub><br>(°) | π-π stacking, ⊥ dist.<br>(Å) | [N-C-N] <sup>+</sup> ...O dist.<br>(Å) |
|-----------------------------------------------------------------------------------------------------------------------|---------------------------------|-------------------------------|-------------------------------|------------------------------|----------------------------------------|
| {[BBI-H <sub>2</sub> -Me <sub>4</sub> ] ⊂ 15DN38C10}(PF <sub>6</sub> ) <sub>2</sub>                                   | 2.328                           | 3.235(6)                      | 159.68                        | 3.3511(14)                   | 3.334 – 3.998                          |
| {[BBI-H <sub>2</sub> -Me <sub>4</sub> ] ⊂ BPP34C10}(PF <sub>6</sub> ) <sub>2</sub>                                    | 2.365<br>2.292                  | 3.154(7)<br>3.116(6)          | 140.16<br>144.74              | 3.505(2)                     | 3.154 – 4.146                          |
| {[BBI-H <sub>2</sub> -Bu <sub>4</sub> ] ⊂ 15DN38C10}(PF <sub>6</sub> ) <sub>2</sub>                                   | 2.692                           | 3.576(4)                      | 159.15                        | 3.6293(14)                   | 3.148 – 3.829                          |
| {[BBI-H <sub>2</sub> -Bu <sub>4</sub> ] ⊂ BPP34C10}(PF <sub>6</sub> ) <sub>2</sub>                                    | 2.383                           | 3.241(4)                      | 150.37                        | 3.3309(14)                   | 3.140 – 3.847                          |
| {[BBI-H <sub>2</sub> -[(CH <sub>2</sub> ) <sub>3</sub> OH] <sub>4</sub> ] ⊂ 15DN38C10}(PF <sub>6</sub> ) <sub>2</sub> | 2.308<br>2.495                  | 3.239(7)<br>3.410(8)          | 166.09<br>161.48              | 3.489(3)                     | 3.083 – 3.773                          |
| {[BBI-H <sub>2</sub> -[(CH <sub>2</sub> ) <sub>6</sub> Br] <sub>4</sub> ] ⊂ 15DN38C10}(PF <sub>6</sub> ) <sub>2</sub> | 2.420                           | 3.340(4)                      | 162.56                        | 3.5038(15)                   | 3.251 – 3.747                          |
| {[BBI-Me <sub>4</sub> -(AuPPh <sub>3</sub> ) <sub>2</sub> ] ⊂ 15DN38C10}(PF <sub>6</sub> ) <sub>2</sub>               | -                               | -                             | -                             | 3.3843(19)                   | -                                      |

a) Calculated using Platon software<sup>6</sup>

### Synthesis of the [BBI-H<sub>2</sub>-(PhTz)<sub>4</sub>](PF<sub>6</sub>)<sub>2</sub> axle

The “clicked” BBI axle was prepared following a one-pot, two-step procedure as shown below.

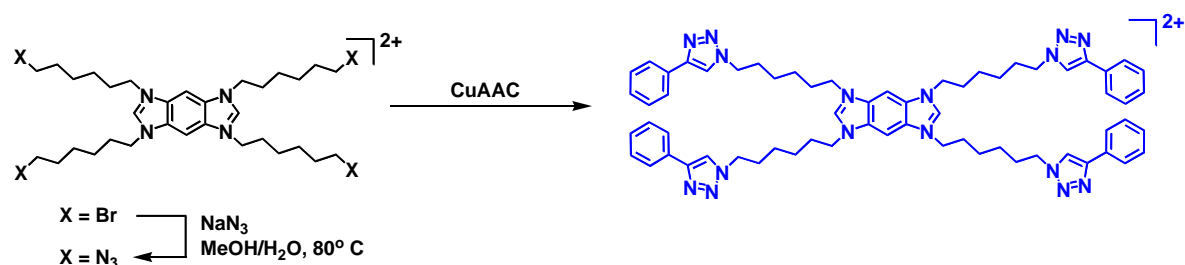

{[BBI-H<sub>2</sub>-[(CH<sub>2</sub>)<sub>6</sub>Br]<sub>4</sub>]}(PF<sub>6</sub>)<sub>2</sub> (0.110 g, 0.1 mmol) was taken in 75 mL of a MeOH : H<sub>2</sub>O mixture (1 : 1 v/v). To the resulting suspension NaN<sub>3</sub> was added (0.033 g 0.5 mmol), and the mixture was stirred overnight at 50° C. Then, Ph-C≡CH (0.055 μL, 0.5 mmol) was added, followed by sodium ascorbate (0.020 g, 20 mol %), and CuSO<sub>4</sub> · 5 H<sub>2</sub>O (0.013 g, 10 mol %). The reaction mixture was stirred at 50° C for 24 hours, then diluted with 75 mL ice cold water. After stirring for another hour, the precipitate was collected on a frit and air dried. Yield 0.108 g, 79 %. <sup>1</sup>H-NMR (400 MHz, acetone-*d*<sub>6</sub>): δ (ppm) 10.03 (s, 2 H, C2-*H*), 9.04 (s, 2 H, C<sub>6</sub>H<sub>2</sub>), 8.30 (s, 4H, Triazole-*H*), 7.85 (d, J = 7.08 Hz, 8H, *Ph*), 7.42 (t, J = 4.96 Hz, 8H, *Ph*), 7.34 (t, J = 1.96 Hz, 4H, *Ph*), 4.83 (t, J = 7.24 Hz, 8 H, Imd-CH<sub>2</sub>-), 4.43 (t, J = 6.76 Hz, 8 H, -CH<sub>2</sub>-Br), 2.21-2.17 (m, 8 H, -CH<sub>2</sub>-), 1.97-1.93 (m, 8 H, -CH<sub>2</sub>-), 1.57-1.49 (m, 8 H, -CH<sub>2</sub>-), 1.44-1.37 (m, 8 H, -CH<sub>2</sub>-).

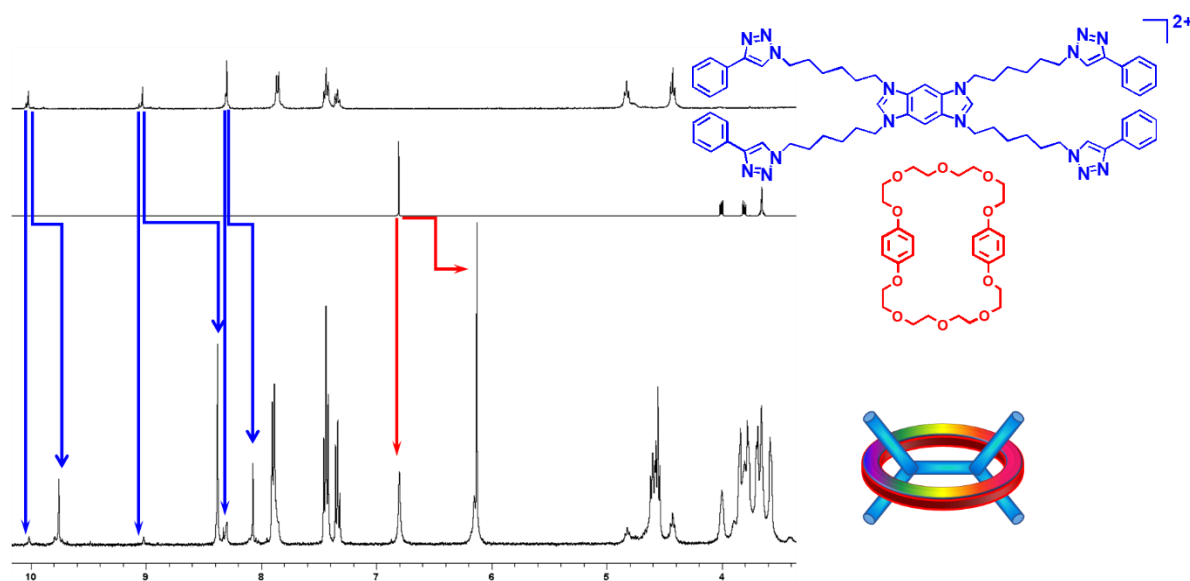

**Fig S16.**  $^1\text{H-NMR}$  spectra (acetone- $d_6$ ) of:  $[\text{BBI-H}_2\text{-PhTz}_4]^{2+}$  (top); BPP34C10 (middle); and an equimolar mixture of the two components (bottom); the  $K_a$  and  $\Delta G^0$  parameters for this compound are  $3.34 \cdot 10^3 \text{ M}^{-1}$  and  $-4.81 \text{ kcal} \cdot \text{mol}^{-1}$ , respectively.

### General procedure for the preparation of gold(I) carbene compounds.

A 100 mL round bottom flask was charged with a stirring bar,  $[\text{BBI-H}_2\text{-R}_4](\text{PF}_6)_2$  ( $\text{R} = \text{Me, Bu, 0.1 mmol}$ ),  $[\text{Au}(\text{acac})\text{PPh}_3]$ ,<sup>7</sup> (0.112 g, 0.2 mmol) and acetone (50 mL). The mixture was stirred for 2 hours at room temperature, then the solvent and the formed acetylaceton by-product were removed under reduced pressure. Recrystallization of the residue from acetone - diethyl ether produced the desired compounds as white powders.

**$[\text{BBI-Me}_4\text{-(AuPPh}_3)_2](\text{PF}_6)_2$ :** 0.092 g, 65 %;  $^1\text{H-NMR}$  (400 MHz, acetone- $d_6$ ):  $\delta$  (ppm) 7.92-7.74 (m, 32H,  $\text{PPh}_3$  overlapped with  $\text{C}_6\text{H}_2$ ), 4.42 (s, 12H,  $-\text{CH}_3$ ).

**$[\text{BBI-Bu}_4\text{-(AuPPh}_3)_2](\text{PF}_6)_2$ :** 0.106 g, 67 %;  $^1\text{H-NMR}$  (400 MHz, acetone- $d_6$ ):  $\delta$  (ppm) 7.86-7.65 (m, 32H,  $\text{PPh}_3$  overlapped with  $\text{C}_6\text{H}_2$ ), 4.64 (t,  $J = 7.52 \text{ Hz}$ , 8 H,  $\text{Imd-CH}_2$ -), 2.21 (p,  $J = 5.61 \text{ Hz}$ , 8 H,  $-\text{CH}_2$ -), 1.39 (sextet,  $J = 7.48 \text{ Hz}$ , 8 H,  $-\text{CH}_2$ -), 0.97 (t,  $J = 7.51 \text{ Hz}$ , 12 H,  $-\text{CH}_3$ ).

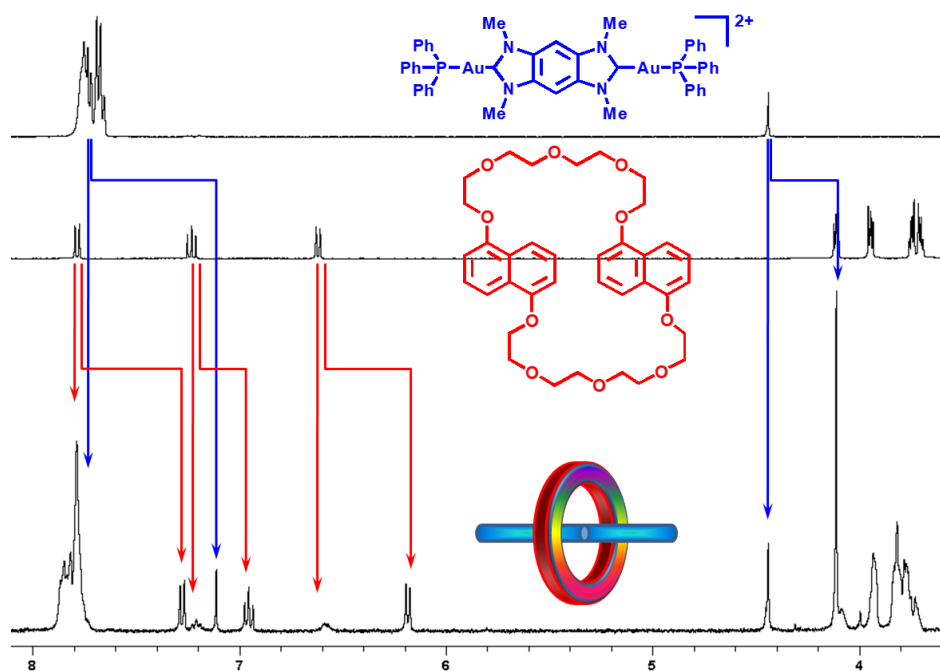

**Fig. S17.**  $^1\text{H-NMR}$  spectra (acetone- $d_6$ ) of:  $[\text{BBI-Me}_4\text{-(AuPPh}_3)_2]^{2+}$  (top); 15DN38C10 (middle); and an equimolar mixture of the two components (bottom).

## References

1. C. J. Bruns, S. Basu, J. F. Stoddart, *Tetrahedron Lett.*, 2010, **51**, 983-986.
2. P. L. Anelli, P. R. Ashton, R. Ballardini, V. Balzani, M. Delgado, M. T. Gandolfi, T. T. Goodnow, A. E. Kaifer, D. Philp, M. Pietraszkiewicz, L. Prodi, M. V. Reddington, A. M. Z. Slawin, N. Spencer, J. F. Stoddart, C. Vicent, and D. J. Williams, *J. Am. Chem. Soc.*, 1992, **114**, 193-218.
3. A. J. Boydston, K. A. Williams, and C. W. Bielawski, *J. Am. Chem. Soc.*, 2005, **127**, 12496-12497.
4. L. J. Barbour, *Supramol. Chem.*, 2001, **1**, 189-191.
5. G. M. Sheldrick, *Acta Crystallogr.*, **2008**, A64, 112-122.
6. A. L. Spek, *Acta Cryst.* 2009, **D65**, 148-155.
7. J. Vicente and M.-T. Chicote, *Inorg. Synth.* 1998, **32**, 172-176.
